# Supplementary material for: Seroprevalence of five diarrhea-related pathogens in bovine herds of scattered households in Inner Mongolia, China between 2019 and 2022
Source: PeerJ. 2023 Oct 27;11:e16013. doi: 10.7717/peerj.16013 (PMC10615030; doi:10.7717/peerj.16013)
Supplement: Supplemental Information 1 [file peerj-11-16013-s001.xlsx]

## Sheet: Sheet1
	Pathogen	Number of positive serum / Total number of samples
		total	0–2	2–6	6–18	>18
	BRV	378/3050	212/1030	103/625	51/595	12/800
	BCOV	391/3050	236/1030	74/625	29/595	52/800
	BVDV	573/3050	134/1030	31/625	12/595	396/800
	K99	421/3050	416/1030	5/625	0	0
	M. paratuberculosis	329/3050	0	16/625	22/595	291/800
	Total	2092/3050	998/1030	229/625	114/595	751/800
