# Supplementary material for: Seroprevalence of five diarrhea-related pathogens in bovine herds of scattered households in Inner Mongolia, China between 2019 and 2022
Source: PeerJ. 2023 Oct 27;11:e16013. doi: 10.7717/peerj.16013 (PMC10615030; doi:10.7717/peerj.16013)
Supplement: Supplemental Information 2 [file peerj-11-16013-s002.xlsx]

## Sheet: Sheet1
	Location	East				Central			West
	League and city	Chifeng	Tongliao	Hulun Buir	Hinggan League	Ulanqab	Xilingol League	Huhhot	Baotou	Ordos	Wuhai	Bayan Nur
	BVDV	98/145	34/325	61/233	72/355	32/329	16/146	147/578	36/275	20/200	7/180	50/284
	BRV	13/145	23/325	31/233	29/355	26/329	71/146	113/578	11/275	16/200	17/180	28/284
	BCOV	16/145	25/325	22/233	26/355	31/329	75/146	119/578	18/275	16/200	18/180	25/284
	K99	13/145	17/325	46/233	45/355	19/329	0/146	125/578	124/275	10/200	3/180	19/284
	M. paratuberculosis	7/145	24/325	79/233	23/355	19/329	0/146	150/578	10/275	10/200	0/180	7/284
